# Supplementary material for: Long-term exposure to fine particulate matter modifies the association between physical activity and hypertension incidence
Source: PubMed Central journal article supplement — J Sport Health Sci. 2022 Jan 19;11(6):708–15. doi: 10.1016/j.jshs.2022.01.004 (PMC9729921; doi:10.1016/j.jshs.2022.01.004), 2022-01-19
Supplement: mmc1.pdf [file mmc1.pdf]

## **Supplementary materials**

### **Long-term exposure to fine particulate matter modifies the association between physical activity and hypertension incidence**

Qiong Liu<sup>1,2</sup>; Keyong Huang<sup>1</sup>; Fengchao Liang<sup>1,3</sup>; Xueli Yang<sup>4</sup>; Jianxin Li<sup>1</sup>; Jichun Chen<sup>1</sup>; Xiaoqing Liu<sup>5</sup>; Jie Cao<sup>1</sup>; Chong Shen<sup>6</sup>; Ling Yu<sup>7</sup>; Yingxin Zhao<sup>8</sup>; Ying Deng<sup>9</sup>; Ying Li<sup>1</sup>; Dongsheng Hu<sup>10,11</sup>; Xiangfeng Lu<sup>1</sup>; Yang Liu<sup>12</sup>; Dongfeng Gu<sup>1,2,13</sup>; Fangchao Liu<sup>1,\*</sup>; Jianfeng Huang<sup>1,\*</sup>

1 Department of Epidemiology, Fuwai Hospital, National Center for Cardiovascular Diseases, Chinese Academy of Medical Sciences and Peking Union Medical College, Beijing 100037, China

2 Key Laboratory of Cardiovascular Epidemiology, Chinese Academy of Medical Sciences, Beijing 100037, China

3 School of Public Health and Emergency Management, Southern University of Science and Technology, Shenzhen 518055, China

4 Tianjin Key Laboratory of Environment, Nutrition and Public Health; Department of Occupational and Environmental Health, School of Public Health, Tianjin Medical University, Tianjin 300070, China

5 Division of Epidemiology, Guangdong Provincial People's Hospital and Cardiovascular Institute, Guangzhou 510080, China

6 Department of Epidemiology and Biostatistics, School of Public Health, Nanjing Medical University, Nanjing 211166, China

7 Department of Cardiology, Fujian Provincial Hospital, Fuzhou 350014, China

8 Cardio-Cerebrovascular Control and Research Center, Institute of Basic Medicine, Shandong Academy of Medical Sciences, Jinan 250062, China

9 Center for Chronic and Noncommunicable Disease Control and Prevention, Sichuan

Center for Disease Control and Prevention, Chengdu 610041, China

10 Department of Epidemiology and Health Statistics, College of Public Health, Zhengzhou University, Zhengzhou 450001, China

11 Department of Biostatistics and Epidemiology, School of Public Health, Shenzhen University Health Science Center, Shenzhen 518071, China

12 Gangarosa Department of Environmental Health, Rollins School of Public Health, Emory University, Atlanta, GA 30322, USA

13 School of Medicine, Southern University of Science and Technology, Shenzhen 518055, China

**Running Title:** PM<sub>2.5</sub>, physical activity, and hypertension

**\*Corresponding author**

Email addresses: [fangchaoliu@126.com](mailto:fangchaoliu@126.com) (Fangchao Liu); [jianfhuang@sina.com](mailto:jianfhuang@sina.com) (Jianfeng Huang)

Supplementary Table 1. Hazard ratios and 95% confidence intervals for hypertension incidence associated with the volume and intensity of physical activity stratified by long-term exposure to PM<sub>2.5</sub> in participants with more than 1-year follow-up.

|                                                  | Quartiles of PA volume (MET-h/day) |                     |                    |                           | <i>P</i> <sub>trend</sub> |
|--------------------------------------------------|------------------------------------|---------------------|--------------------|---------------------------|---------------------------|
|                                                  | First (≤18.0)                      | Second (>18.0-32.0) | Third (>32.0-54.5) | Fourth (>54.5)            |                           |
| Low PM <sub>2.5</sub> (<59.8 µg/m <sup>3</sup> ) |                                    |                     |                    |                           |                           |
| No. of cases/ person-years                       | 1711/46,949                        | 1447/46,667         | 1482/52,295        | 1468/50,060               |                           |
| Multivariable-adjusted model 1 <sup>a</sup>      | 1.00                               | 0.93(0.86-1.00)     | 0.86(0.79-0.93)    | 0.79(0.73-0.86)           | <0.001                    |
| High PM <sub>2.5</sub> (≥59.8µg/m <sup>3</sup> ) |                                    |                     |                    |                           |                           |
| No. of cases/ person-years                       | 1988/62,376                        | 1446/45,630         | 1119/39,530        | 1106/41,476               |                           |
| Multivariable-adjusted model 1 <sup>a</sup>      | 1.00                               | 1.11(1.03-1.19)     | 1.05(0.97-1.14)    | 1.06(0.98-1.16)           | 0.289                     |
|                                                  | Average PA intensity (MET)         |                     |                    | <i>P</i> <sub>trend</sub> |                           |
|                                                  | Light (1.6-<3.0)                   | Moderate (3.0-<6.0) | Vigorous (≥6.0)    |                           |                           |
| Low PM <sub>2.5</sub> (<59.8 µg/m <sup>3</sup> ) |                                    |                     |                    |                           |                           |
| No. of cases/ person-years                       | 2458/71,947                        | 2230/77,155         | 1343/44,871        |                           |                           |
| Multivariable-adjusted model 2 <sup>b</sup>      | 1.00                               | 0.87(0.80-0.94)     | 0.79(0.70-0.90)    |                           | <0.001                    |
| High PM <sub>2.5</sub> (≥59.8µg/m <sup>3</sup> ) |                                    |                     |                    |                           |                           |
| No. of cases/ person-years                       | 2372/75,198                        | 1947/65,595         | 1214/44,766        |                           |                           |
| Multivariable-adjusted model 2 <sup>b</sup>      | 1.00                               | 1.12(1.03-1.22)     | 1.18(1.04-1.34)    |                           | 0.016                     |

<sup>a</sup> Cox proportional hazard model was stratified by cohort, and adjusted for age, sex, education level, urbanicity, geographic region, smoking status, alcohol drinking, body mass index, systolic blood pressure, diabetes mellitus, total cholesterol, and temperature.

<sup>b</sup> Adjusted for covariates in multivariable-adjusted model 1 and physical activity volume in MET-h/day.

Abbreviations: MET = metabolic equivalent; PA = physical activity; PM<sub>2.5</sub> = fine particulate matter.

Supplementary Table 2. Hazard ratios and 95% confidence intervals for hypertension incidence associated with the volume and intensity of physical activity stratified by PM<sub>2.5</sub> exposure further adjusting for county-level averaged years of education.

|                                                         | Quartiles of PA volume (MET-h/day) |                     |                    |                           | <i>P</i> <sub>trend</sub> |
|---------------------------------------------------------|------------------------------------|---------------------|--------------------|---------------------------|---------------------------|
|                                                         | First (≤18.0)                      | Second (>18.0-32.0) | Third (>32.0-54.5) | Fourth (>54.5)            |                           |
| <b>Low PM<sub>2.5</sub> (&lt;59.8 μg/m<sup>3</sup>)</b> |                                    |                     |                    |                           |                           |
| No. of cases/ person-years                              | 1741/46,967                        | 1477/46,685         | 1522/52,313        | 1535/50,095               |                           |
| Multivariable-adjusted model 1 <sup>a</sup>             | 1.00                               | 0.93(0.87-1.01)     | 0.88(0.81-0.96)    | 0.84(0.77-0.92)           | <0.001                    |
| <b>High PM<sub>2.5</sub> (≥59.8 μg/m<sup>3</sup>)</b>   |                                    |                     |                    |                           |                           |
| No. of cases/ person-years                              | 2049/62,409                        | 1487/45,653         | 1150/39,541        | 1139/41,492               |                           |
| Multivariable-adjusted model 1 <sup>a</sup>             | 1.00                               | 1.08(1.00-1.15)     | 1.01(0.93-1.09)    | 1.01(0.93-1.10)           | 0.903                     |
|                                                         | Average PA intensity (MET)         |                     |                    | <i>P</i> <sub>trend</sub> |                           |
|                                                         | Light (1.6-<3.0)                   | Moderate (3.0-<6.0) | Vigorous (≥6.0)    |                           |                           |
| <b>Low PM<sub>2.5</sub> (&lt;59.8 μg/m<sup>3</sup>)</b> |                                    |                     |                    |                           |                           |
| No. of cases/ person-years                              | 2503/71,973                        | 2291/77,185         | 1403/44,905        |                           |                           |
| Multivariable-adjusted model 2 <sup>b</sup>             | 1.00                               | 0.88(0.81-0.95)     | 0.81(0.72-0.92)    |                           | 0.003                     |
| <b>High PM<sub>2.5</sub> (≥59.8 μg/m<sup>3</sup>)</b>   |                                    |                     |                    |                           |                           |
| No. of cases/ person-years                              | 2450/75,239                        | 1992/65,618         | 1255/44,784        |                           |                           |
| Multivariable-adjusted model 2 <sup>b</sup>             | 1.00                               | 1.09(1.00-1.18)     | 1.17(1.03-1.32)    |                           | 0.017                     |

<sup>a</sup> Cox proportional hazard model was stratified by cohort, adjusted for age, sex, education level, urbanicity, geographic region, county-level averaged years of education, smoking status, alcohol drinking, body mass index, systolic blood pressure, diabetes mellitus, total cholesterol, and temperature.

<sup>b</sup> Adjusted for covariates in multivariable-adjusted model 1 and physical activity volume in MET-h/day.

Abbreviations: MET = metabolic equivalent; PA = physical activity; PM<sub>2.5</sub> = fine particulate matter.

Supplementary Table 3. Hazard ratios and 95% confidence intervals for hypertension incidence associated with the volume and intensity of physical activity stratified by PM<sub>2.5</sub>, with PM<sub>2.5</sub> exposure dichotomized by the 75<sup>th</sup> percentile of exposure range.

|                                                   | Quartiles of PA volume (MET-h/day) |                     |                    |                           | <i>P</i> <sub>trend</sub> |
|---------------------------------------------------|------------------------------------|---------------------|--------------------|---------------------------|---------------------------|
|                                                   | First (≤18.0)                      | Second (>18.0-32.0) | Third (>32.0-54.5) | Fourth (>54.5)            |                           |
| Low PM <sub>2.5</sub> (<77.7 μg/m <sup>3</sup> )  |                                    |                     |                    |                           |                           |
| No. of cases/ person-years                        | 2711/73,164                        | 2151/66,797         | 1980/65,921        | 1955/60,871               |                           |
| Multivariable-adjusted model 1 <sup>a</sup>       | 1.00                               | 0.94(0.88-0.99)     | 0.81(0.76-0.87)    | 0.77(0.72-0.83)           | <0.001                    |
| High PM <sub>2.5</sub> (≥77.7 μg/m <sup>3</sup> ) |                                    |                     |                    |                           |                           |
| No. of cases/ person-years                        | 1079/36,212                        | 813/25,541          | 692/25,933         | 719/30,716                |                           |
| Multivariable-adjusted model 1 <sup>a</sup>       | 1.00                               | 1.15(1.05-1.26)     | 1.01(0.92-1.12)    | 0.97(0.87-1.07)           | 0.191                     |
|                                                   | Average PA intensity, MET          |                     |                    | <i>P</i> <sub>trend</sub> |                           |
|                                                   | Light (1.6-<3.0)                   | Moderate (3.0-<6.0) | Vigorous (≥6.0)    |                           |                           |
| Low PM <sub>2.5</sub> (<77.7 μg/m <sup>3</sup> )  |                                    |                     |                    |                           |                           |
| No. of cases/ person-years                        | 3764/107,407                       | 3135/101,792        | 1772/5,4621        |                           |                           |
| Multivariable-adjusted model 2 <sup>b</sup>       | 1.00                               | 0.86(0.81-0.93)     | 0.82(0.74-0.92)    |                           | 0.001                     |
| High PM <sub>2.5</sub> (≥77.7 μg/m <sup>3</sup> ) |                                    |                     |                    |                           |                           |
| No. of cases/ person-years                        | 1189/39,805                        | 1148/41,011         | 886/35,068         |                           |                           |
| Multivariable-adjusted model 2 <sup>b</sup>       | 1.00                               | 1.14(1.03-1.26)     | 1.26(1.09-1.46)    |                           | 0.003                     |

<sup>a</sup> Cox proportional hazard model was stratified by cohort, adjusted for age, sex, education level, urbanicity, geographic region, smoking status, alcohol drinking, body mass index, systolic blood pressure, diabetes mellitus, total cholesterol, and temperature.

<sup>b</sup> Adjusted for covariates in multivariable-adjusted model 1 and physical activity volume in MET-h/day.

Abbreviations: MET = metabolic equivalent; PA = physical activity; PM<sub>2.5</sub> = fine particulate matter.

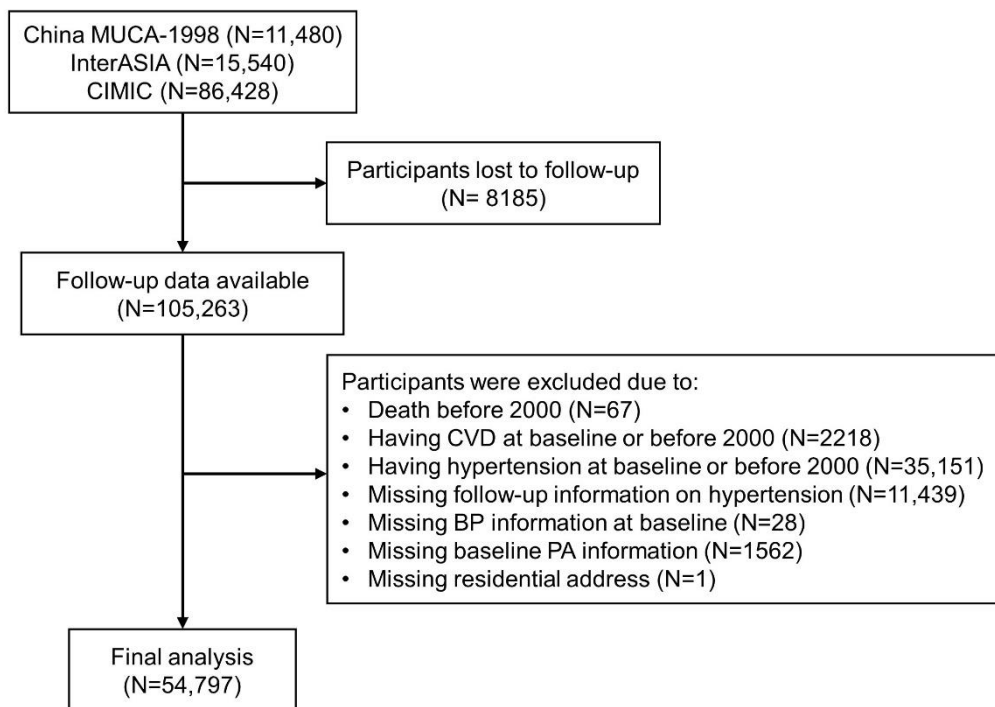

Fig. S1. Flow chart of participant selection.

BP = blood pressure; China MUCA-1998 = China Multi-Center Collaborative Study of Cardiovascular Epidemiology (1998); CIMIC = Community Intervention of Metabolic Syndrome in China & Chinese Family Health Study; CVD = cardiovascular disease; InterASIA = International Collaborative Study of Cardiovascular disease in Asia; PA = physical activity.
